# Supplementary material for: Whole‐Genome Sequence of Synthesized Allopolyploids in Cucumis Reveals Insights into the Genome Evolution of Allopolyploidization
Source: PubMed Central journal article supplement (PMC8097326; doi:10.1002/advs.202004222), 2021-02-15
Supplement: ADVS-8-2004222-s001.pdf [file ADVS-8-2004222-s001.pdf]

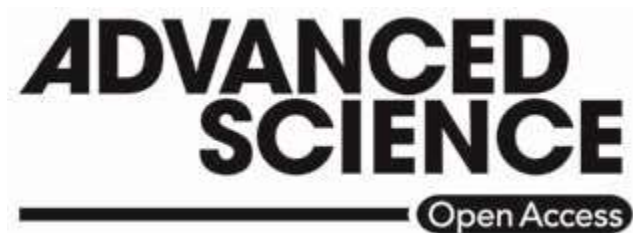

## Supporting Information

for *Adv. Sci.*, DOI: 10.1002/adv.202004222

Whole Genome Sequence of Synthesized Allopolyploids in *Cucumis* Reveal Insights into the Genome Evolution of Allopolyploidization

*Xiaqing Yu, Panqiao Wang, Ji Li, Qinzheng Zhao, Changmian Ji, Zaobing Zhu, Yufei Zhai, Xiaodong Qin, Junguo Zhou, Haiyan Yu, Xinchao Cheng, Shiro Isshiki, Molly Jahn, Jeff J. Doyle, Carl-Otto Ottosen, Yuling Bai, Qinsheng Cai, Chunyan Cheng, Qunfeng Lou, Sanwen Huang and Jinfeng Chen\**

## Supporting Information

### **Whole Genome Sequence of Synthesized Allopolyploids in *Cucumis* Reveal Insights into the Genome Evolution of Allopolyploidization.**

*Xiaqing Yu, Panqiao Wang, Ji Li, Qinzheng Zhao, Changmian Ji, Zaobing Zhu, Yufei Zhai, Xiaodong Qin, Junguo Zhou, Haiyan Yu, Xinchao Cheng, Shiro Isshiki, Molly Jahn, Jeff J. Doyle, Carl-Otto Ottosen, Yuling Bai, Qinsheng Cai, Chunyan Cheng, Qunfeng Lou, Sanwen Huang and Jinfeng Chen\**

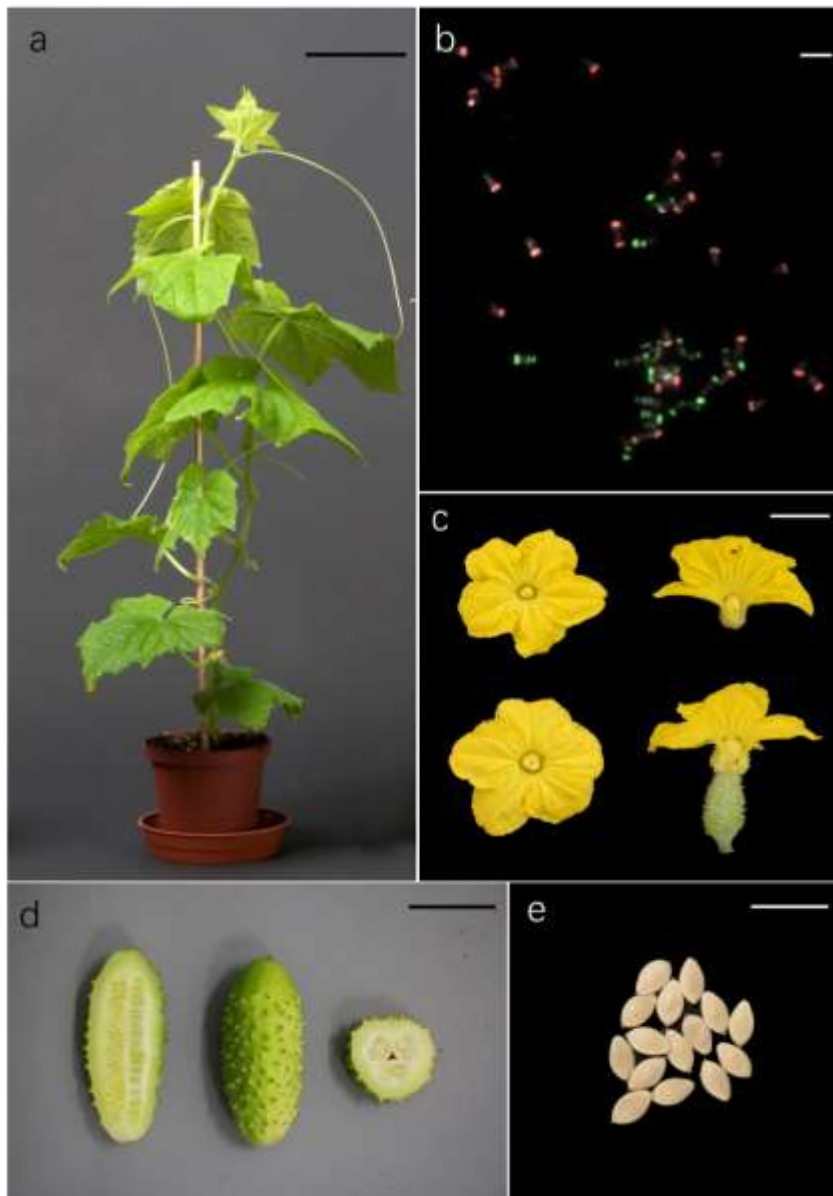

**Figure S1.** a) Plant, b) mitotic metaphase chromosome pattern, c) flowers, d) fruits, and e) seeds of *C. xhytivus* (S<sub>14</sub>). Scale bars indicate a) 10 cm, b) 5 μm, c) 1 cm, d) 5 cm, and e) 1 cm. Red and blue GISH singles in b indicate the Chh and Chc subgenomes respectively.

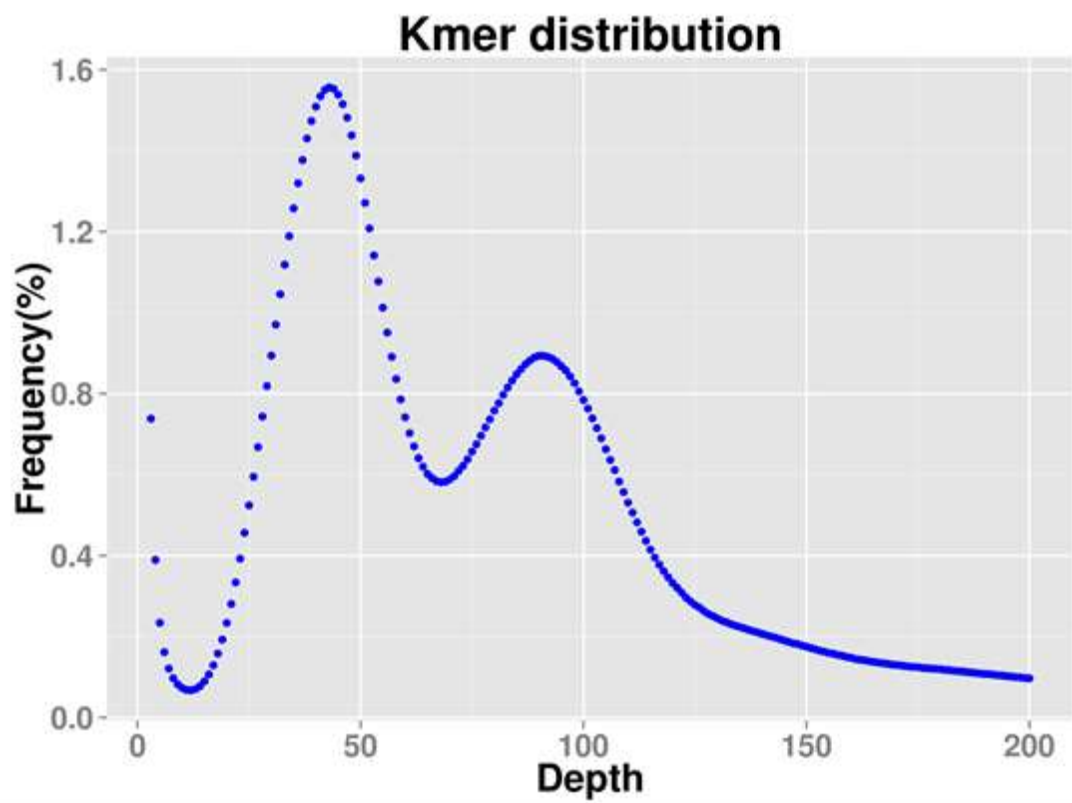

**Figure S2.** K-mer 17 distribution of *C. xhytivus* (S<sub>14</sub>).

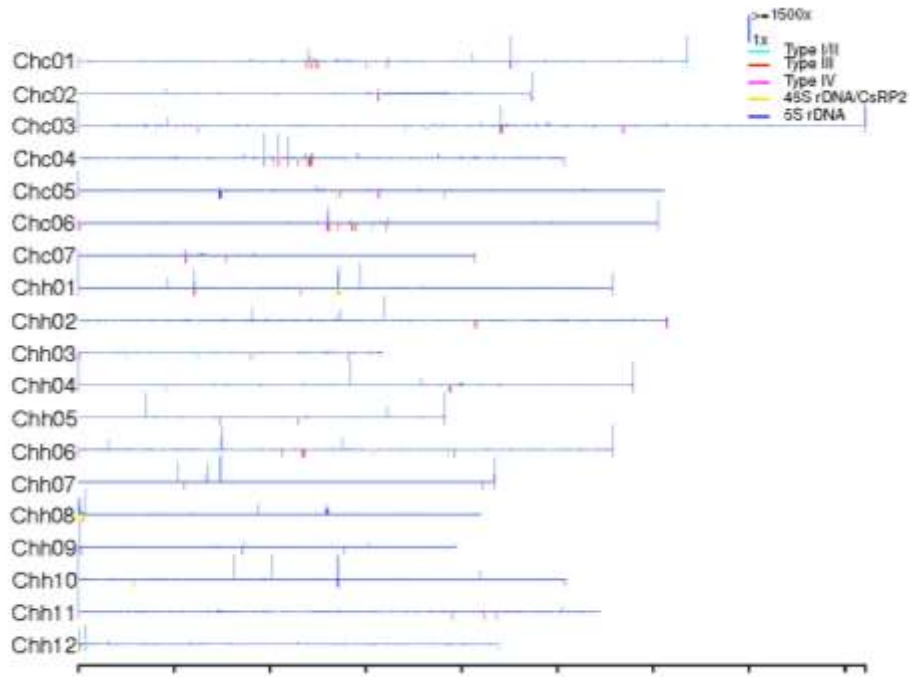

**Figure S3.** Illumina reads depth on assembly of *C. ×hytivus* (S<sub>14</sub>) in 1-kb sliding windows. Regions that have depth over 1500 × were shown as the highest 1500 ×. The location of each type of repeats were indicated with different color as marked in the top right corner.

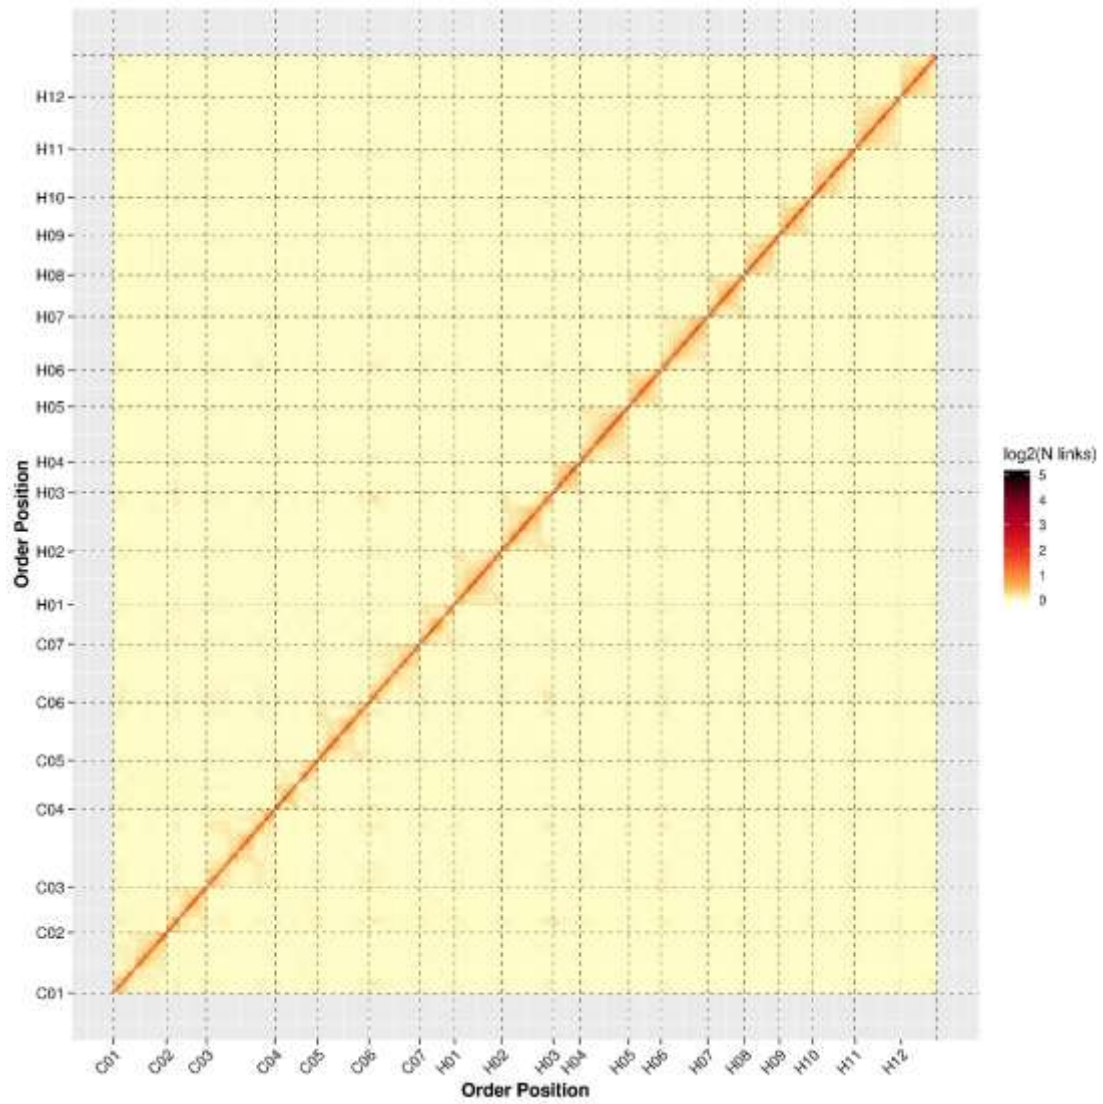

**Figure S4.** Heatmap of chromosome conformation capture analysis by synthetic intra-chromosomal contact matrix. The intensity of interaction represents the normalized count of Hi-C links between 100 Kb bins on a logarithmic scale. The colored bar on the right side of the figure indicates the strength of interaction, from low (yellow) to high (red).

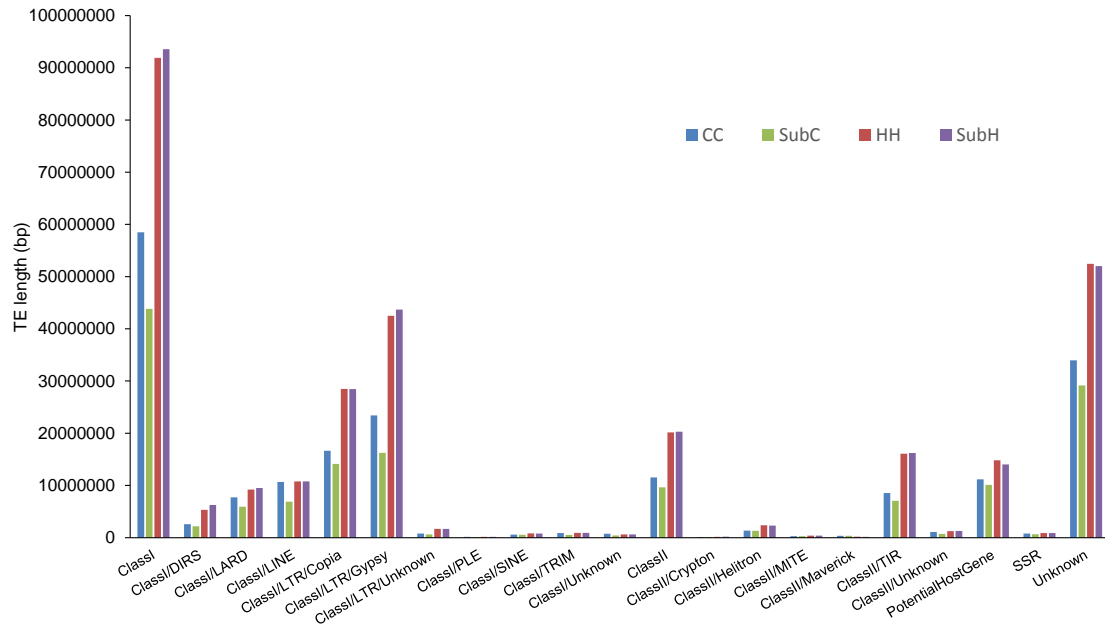

**Figure S5.** Comparison of the main transposable element (TE) types in syntenic region of the *C. xhytivus* (S<sub>14</sub>) subgenomes and their parents *C. sativus* (CC) and *C. hystrix* (HH).

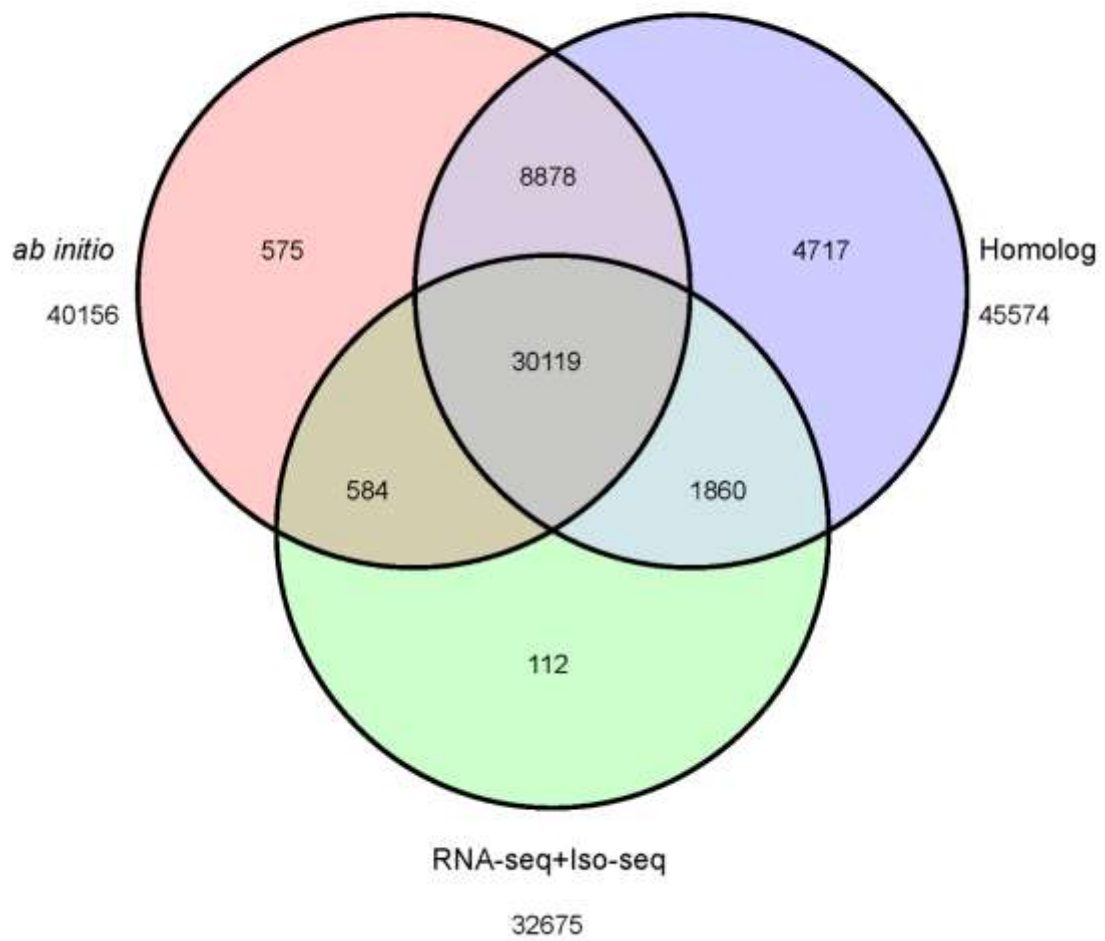

**Figure S6.** Venn diagram showing genes predicted by different methods. The numbers in the diagram representing the number of genes shared between or distinct to the indicated methods.



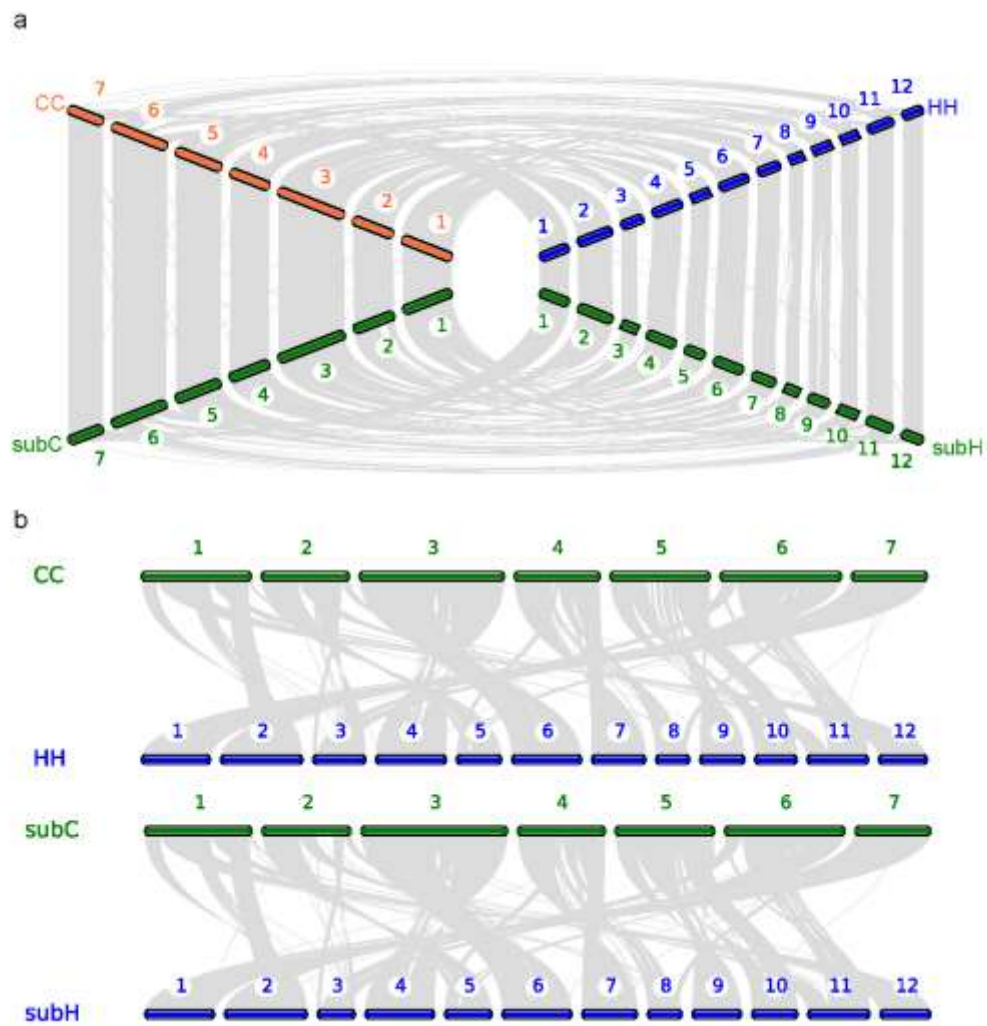

**Figure S7.** Syntenic comparisons among subgenomes of *C. ×hytivus* ( $S_{14}$ ), *C. sativus* (CC), and *C. hystrix* (HH) genomes. a) Reciprocal syntenic comparison of *C. ×hytivus* ( $S_{14}$ ) and its parental diploid genomes. b) Collinearity between the sub H- and C-genome in *C. ×hytivus* ( $S_{14}$ ) and the HH and CC genome in diploid parents.

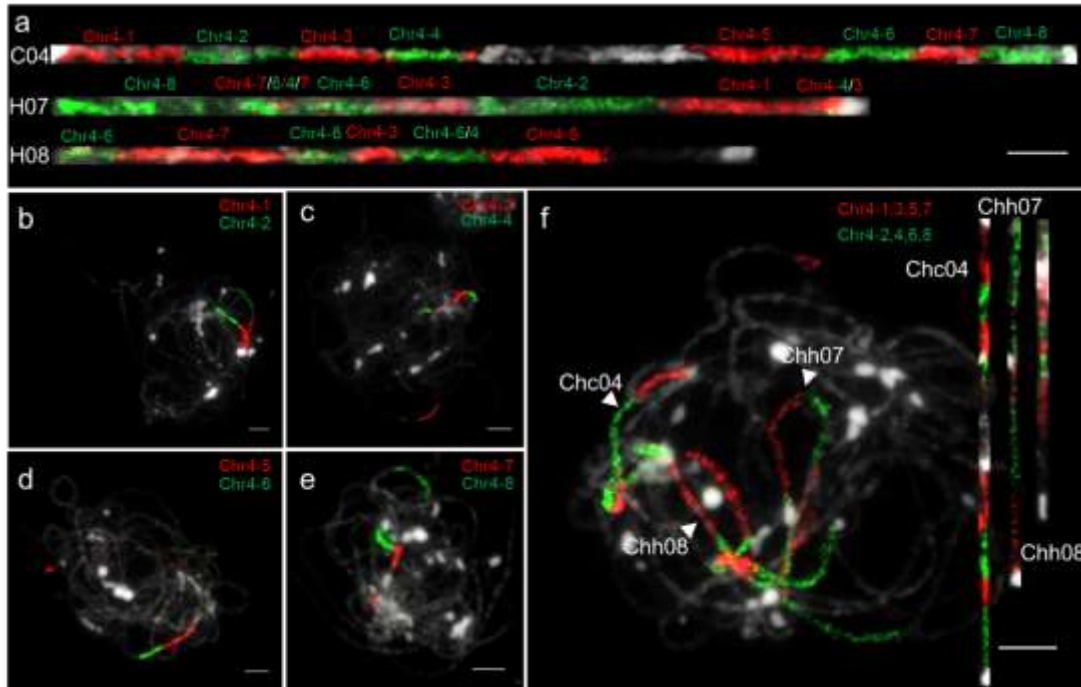

**Figure S8.** Comparative chromosome painting using 8 oligos sub-pools from cucumber Chr4. **a)** Syntenic blocks between *C. sativus* chromosome C04 and *C. hystrix* chromosomes H07 and H08. **b-e)** The painting was performed using every two subsections probes to accurately anchor each syntenic blocks: **b)** Chr4-1 (red) and Chr4-2 (green), **c)** Chr4-3 (red) and Chr4-4 (green), **d)** Chr4-5 (red) and Chr4-6 (green), **e)** Chr4-7 (red) and Chr4-8 (green). **f)** Chromosome segmentation painting on meiotic pachytene chromosomes of *C. x hystivus* (S<sub>14</sub>) using oligo probes of Chr4-1, -3, -5, -7 and Chr4-2, -4, -6, -8. Scale bars indicate 5  $\mu$ m.

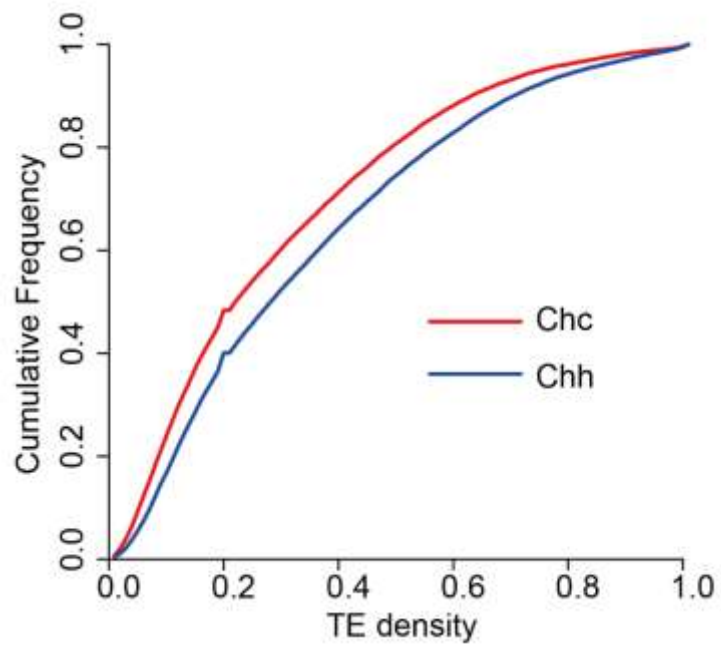

**Figure S9.** Comparison of TE densities near genes between the Chc and Chh subgenomes of *C. xhytivus* (S<sub>14</sub>).

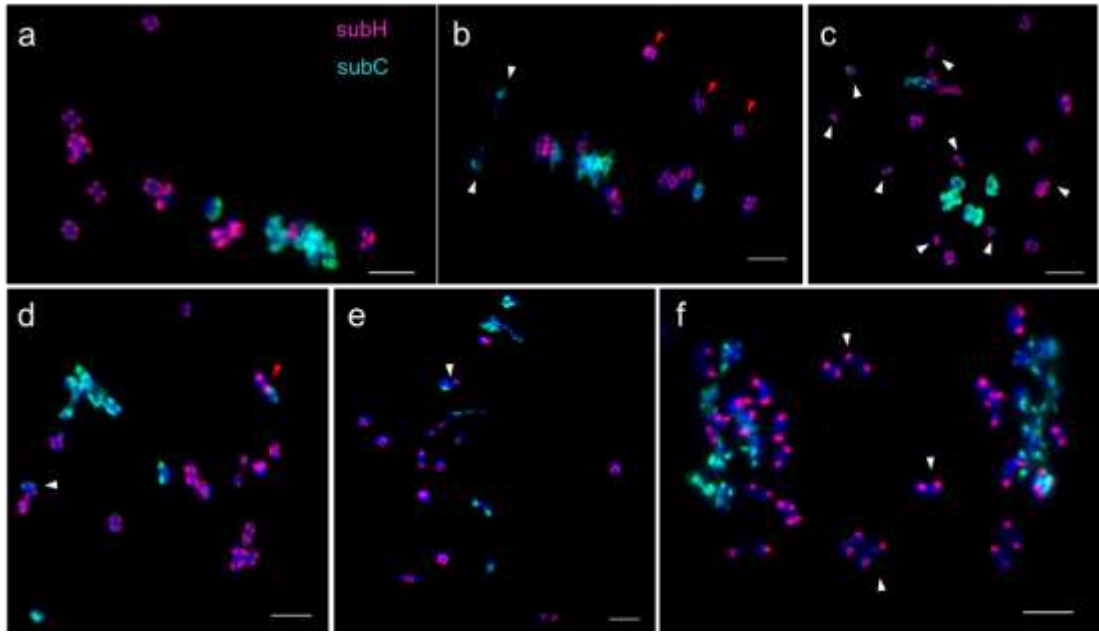

**Figure S10.** Representative abnormal meiotic chromosome behavior in PMCs of synthetic allotetraploid *C. x hytivus*. **a)** GISH image shows 19 homologous bivalents, 12 H- bivalents (red) and 7 C- bivalents (green). **b)** One early disjunction C- bivalent (white arrows) and three H- bivalents that were not aligned to the equatorial plate (red arrows). **c)** Eight univalents from H-subgenome (white arrows). **d)** One C-H inter-genomic pairing (red arrow) and one HH-C trivalents (white arrow). **e)** One CC-H trivalents (white arrow). **f)** Five lagging H-subgenome chromosomes at anaphase I. Scale bars indicate 5  $\mu$ m.

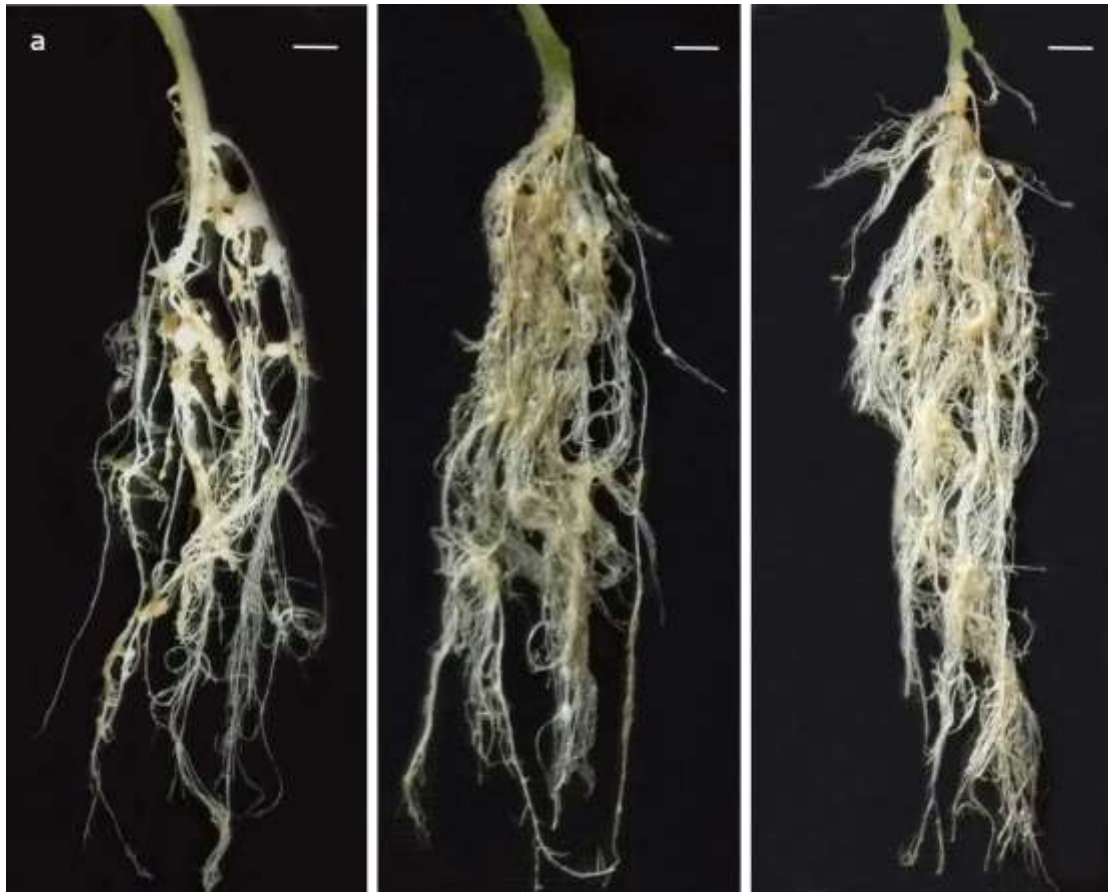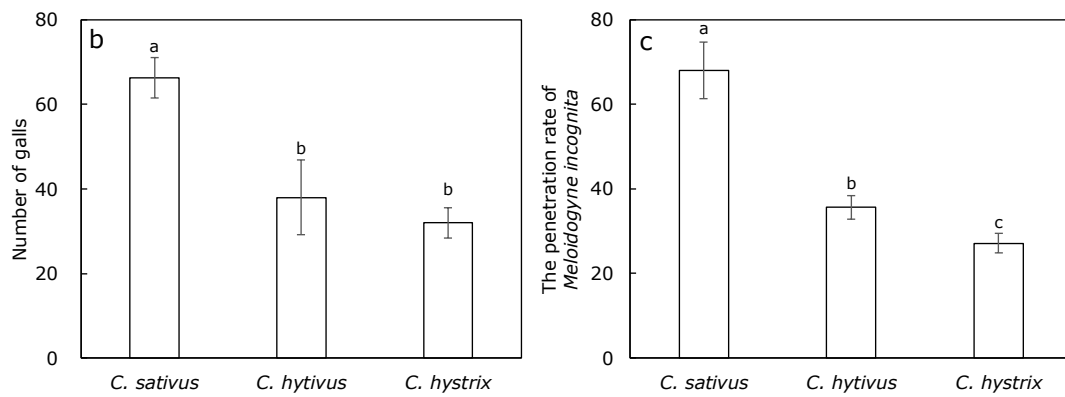

**Figure S11.** a) Root symptoms of *C. sativus* L. 'BeijingJietou', *C. ×hytivus* (S<sub>14</sub>) and *C. hystrix* Chakr. (from left to right) after 30 days inoculation with *Meloidogyne incognita*. b) Number of galls and c) the penetration rate of *Meloidogyne incognita* in *C. sativus* L. 'BeijingJietou', *C. ×hytivus* (S<sub>14</sub>), and *C. hystrix* Chakr. inoculated with *Meloidogyne incognita* for 30 days. Vertical bars represent the mean values  $\pm$  SD (n = 4). Significance level  $P < 0.05$ . Scale bars indicate 1 cm.

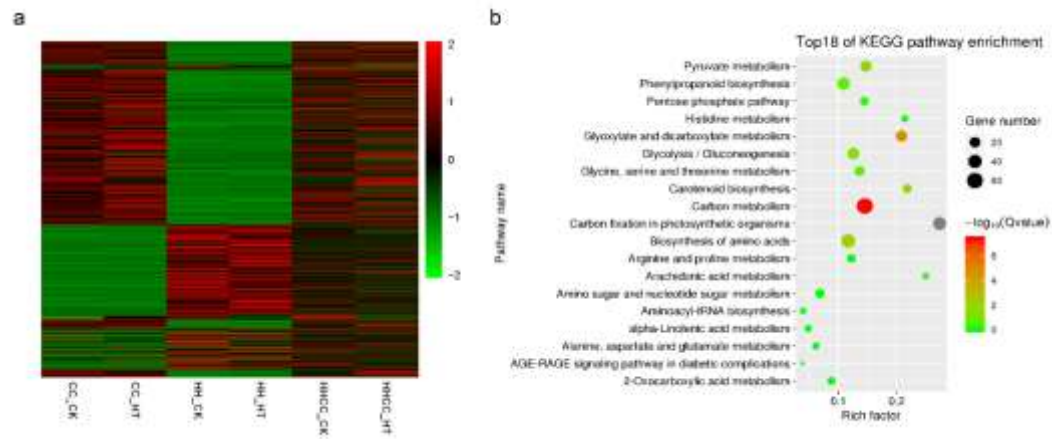

**Figure S12.** a) Heat maps of gene expression that altered after heat treatment exclusively in *C. xhytivus* (S<sub>14</sub>). b) The KEGG (Kyoto Encyclopedia of Genes and Genomes, <http://www.genome.jp/kegg>) pathway enrichment analysis of these DEGs (differently expressed genes).

**Table S1.** Summary of BioNano data for *Cucumis ×hytivus*.

| Information                                 |         |
|---------------------------------------------|---------|
| BioNano high quality data                   |         |
| N mols                                      | 730,970 |
| Total length (Gb)                           | 163.4   |
| Filtered (Gb)                               | 108.46  |
| (-minlen 150 -minsites 8 -maxIntensity 0.6) |         |
| Average length (kb)                         | 247.524 |
| Mol N50 (kb)                                | 245.221 |
| Lab (/100kb)                                | 9.617   |
| Contig Coverage (×)                         | 200     |
| BioNano assembly results                    |         |
| N Genome Maps                               | 300     |
| Total Length (Mb)                           | 499.04  |
| Mean Length (Mb)                            | 1.66    |
| Median Length (Mb)                          | 1.03    |
| L50 Length (Mb)                             | 2.59    |
| Maximum Length (Mb)                         | 13.125  |

**Table S2.** Genome estimation by flow cytometry for *Cucumis ×hytivus* (S<sub>14</sub>).

|                                                                           | Peak value | CV (%)     | Genome size (Mb) |
|---------------------------------------------------------------------------|------------|------------|------------------|
| <i>C. sativus</i> (BeijingJietou) / <i>C. ×hytivus</i> (S <sub>14</sub> ) | 60.08      | 10.00      | 865.0            |
|                                                                           | /141.60    | /3.53      |                  |
| <i>C. sativus</i> (BeijingJietou) / <i>C. ×hytivus</i> (S <sub>14</sub> ) | 64.97      | 8.45 /4.45 | 796.5            |
|                                                                           | /141.00    |            |                  |
| <i>C. sativus</i> (BeijingJietou) / <i>C. ×hytivus</i> (S <sub>14</sub> ) | 65.51      | 8.73 /5.08 | 752.4            |
|                                                                           | /134.31    |            |                  |
| mean                                                                      |            |            | 804.6            |

**Table S3.** Summary of the predicted and assembled repeats in the genome of *Cucumis ×hytivus* (S<sub>14</sub>).

| Type                            | No. of reads | Percentage of the genome, % | Assembled length (bp) | Percentage of the genome, % (estimated genome size=699.87 bp) |
|---------------------------------|--------------|-----------------------------|-----------------------|---------------------------------------------------------------|
| <i>C. hystrix</i> 45S rRNA gene | 2105381      | 1.8767                      | 1347774               | 0.1926                                                        |
| <i>C. sativus</i> 45S rRNA gene | 1046054      | 0.9324                      |                       |                                                               |
| <i>C. hystrix</i> 5S rRNA gene  | 128041       | 0.1141                      | 357912                | 0.0511                                                        |
| <i>C. sativus</i> 5S rRNA gene  | 53014        | 0.0473                      |                       |                                                               |
| Type I/II                       | 3200085      | 2.8524                      | 1618847               | 0.2313                                                        |
| Type III                        | 1545448      | 1.3776                      | 2330073               | 0.3329                                                        |
| Type IV                         | 4627569      | 4.1248                      | 1364129               | 0.1949                                                        |
| Other predicted repeats         | 57610216     | 51.35                       | 269717804             | 38.54                                                         |
| Total                           | 70315808     | 62.6753                     | 276736539             | 39.5428                                                       |

Note: Other predicted repeats refer to predicted repeats exclude type I, II, III, IV satellite DNAs, 5S and 45S rDNA.

**Table S4.** Summary of Hi-C data for error correction and chromosome construction.

| Library ID              | H01            |
|-------------------------|----------------|
| Insert size(bp)         | 350            |
| Read pairs              | 188,164,110    |
| Base number (bp)        | 56,320,109,636 |
| Coverage (×)            | 104            |
| Uniquely mapping pairs  | 109,378,897    |
| Valid interaction pairs | 64,534,262     |



**Table S5.** Hi-C assembly statistics.

| Subgenome                            | Group | Sequence number | Sequence length (bp) |
|--------------------------------------|-------|-----------------|----------------------|
| Chc                                  | C01   | 35              | 34,248,536           |
|                                      | C02   | 46              | 28,288,356           |
|                                      | C03   | 36              | 43,400,534           |
|                                      | C04   | 103             | 35,111,878           |
|                                      | C05   | 44              | 34,444,263           |
|                                      | C06   | 28              | 33,018,195           |
|                                      | C07   | 44              | 23,132,997           |
| Chh                                  | H01   | 19              | 28,866,816           |
|                                      | H02   | 11              | 31,229,774           |
|                                      | H03   | 4               | 15,993,672           |
|                                      | H04   | 13              | 29,445,157           |
|                                      | H05   | 2               | 19,160,231           |
|                                      | H06   | 2               | 27,958,546           |
|                                      | H07   | 6               | 21,903,403           |
|                                      | H08   | 25              | 22,913,624           |
|                                      | H09   | 8               | 19,897,686           |
|                                      | H10   | 15              | 25,735,317           |
|                                      | H11   | 12              | 27,750,859           |
|                                      | H12   | 32              | 23,284,939           |
| Total Sequences Clustered            |       | 485(73.04)      | 525,784,783(97.23)   |
| Total Sequences Ordered and Oriented |       | 121(24.95)      | 490,714,831(93.33)   |
| Total Sequences unclustered          |       | 179             | 14,953,311           |
| Total sequence                       |       | 664             | 540,738,094          |

**Table S6.** Summary of repeat content in *Cucumis ×hytivus* (S<sub>14</sub>), *C. sativus*, and *C. hystrix*. (excel)**Table S7.** Summary of Iso-Seq. (excel)

**Table S8.** Statistics of gene prediction strategy.

| Method           | Software    | Species                     | Gene number |
|------------------|-------------|-----------------------------|-------------|
| <i>Ab initio</i> | Genscan     | -                           | 30,121      |
|                  | Augustus    | -                           | 40,230      |
|                  | GlimmerHMM  | -                           | 47,780      |
|                  | GeneID      | -                           | 46,323      |
|                  | SNAP        | -                           | 39,548      |
| Homology-based   | GeMoMa      | <i>Arabidopsis thaliana</i> | 35,614      |
|                  |             | <i>Oryza sativa</i>         | 33,573      |
|                  |             | <i>Citrullus lanatus</i>    | 42,160      |
|                  |             | <i>Cucumis melo</i>         | 49,637      |
|                  |             | <i>Cucumis sativus</i>      | 47,429      |
| RNA-seq+ Iso-seq | PASA        | -                           | 74,619      |
|                  | GeneMarkS-T | -                           | 60,966      |
| Integration      | EVM         | -                           | 46,845      |

**Table S9.** Summary of predicted genes in *Cucumis ×hytivus* (S<sub>14</sub>).

| Category                   | Chc subgenome | Chh subgenome | Unknown | Total     |
|----------------------------|---------------|---------------|---------|-----------|
| Gene number                | 23108         | 22535         | 1202    | 46845     |
| Gene length (bp)           | 85703136      | 93740821      | 2396341 | 181840298 |
| Average gene length (bp)   | 3708.81       | 4159.79       | 1993.63 | 3881.74   |
| Exon number                | 121855        | 121014        | 3324    | 246193    |
| Exon length (bp)           | 34644735      | 36250203      | 868704  | 71763642  |
| Average exon length (bp)   | 1499.25       | 1608.62       | 722.72  | 1531.94   |
| CDS length per gene (bp)   | 1170.99       | 1187.17       | 686.76  | 1166.35   |
| Exon num per gene          | 5.27          | 5.37          | 2.77    | 5.26      |
| Intron number              | 98747         | 98479         | 2122    | 199348    |
| Intron length (bp)         | 51058401      | 57490618      | 1527637 | 110076656 |
| Average intron length (bp) | 2209.56       | 2551.17       | 1270.91 | 2349.81   |
| Intron number per gene     | 4.27          | 4.37          | 1.77    | 4.26      |

**Table S10. Statistics of genes annotated by different databases.**

| <b>Databas<br/>e</b> | <b>Total<br/>gene<br/>number</b> | <b>Percentag<br/>e</b> | <b>Chc<br/>gene<br/>numbe<br/>r</b> | <b>Percenta<br/>ge</b> | <b>Chh gene<br/>number</b> | <b>Percenta<br/>ge</b> | <b>Unknown<br/>gene<br/>number</b> | <b>Percenta<br/>ge</b> |
|----------------------|----------------------------------|------------------------|-------------------------------------|------------------------|----------------------------|------------------------|------------------------------------|------------------------|
| GO                   | 22804                            | 48.68%                 | 11212                               | 48.52%                 | 11073                      | 49.14%                 | 519                                | 43.18%                 |
| KEGG                 | 15851                            | 33.84%                 | 7765                                | 33.60%                 | 7691                       | 34.13%                 | 395                                | 32.86%                 |
| KOG                  | 22421                            | 47.86%                 | 11037                               | 47.76%                 | 10965                      | 48.66%                 | 419                                | 34.86%                 |
| TrEMBL               | 45549                            | 97.23%                 | 22715                               | 98.30%                 | 21749                      | 96.51%                 | 1085                               | 90.27%                 |
| nr                   | 45676                            | 97.50%                 | 22756                               | 98.48%                 | 21828                      | 96.86%                 | 1092                               | 90.85%                 |
| Total                | 45687                            | 97.53%                 | 22757                               | 98.48%                 | 21832                      | 96.88%                 | 1098                               | 91.35%                 |

**Table S11.** Completeness inspection based on CEG and Plantae BUSCO database for *Cucumis ×hytivus* (S<sub>14</sub>).

| Information                                 |        |
|---------------------------------------------|--------|
| Complete BUSCOs                             | 1309   |
| Complete and single-copy BUSCOs             | 154    |
| Complete and Duplicated BUSCOs              | 1155   |
| Fragmented BUSCOs                           | 34     |
| Missing BUSCOs                              | 97     |
| Number of 458 CEGs present in assembly      | 448    |
| % of 458 CEGs present in assemblies         | 97.82% |
| Number of 248 highly conserved CEGs present | 224    |
| % of 248 highly conserved CEGs present      | 90.32% |

**Table S12.** Summary of non-coding RNAs and pseudogenes

| Type        | Number | Average Length (bp) | Total Length (bp) | % of Genome |
|-------------|--------|---------------------|-------------------|-------------|
| miRNA       | 134    | 119.42              | 16002             | 0.003%      |
| tRNA        | 1274   | 79.11               | 100782            | 0.019%      |
| rRNA        | 2125   | 719.35              | 1528612           | 0.288%      |
| 18S         | 403    | 1232.80             | 496820            | 0.094%      |
| 28S         | 361    | 2397.07             | 865341            | 0.163%      |
| 5.8S        | 258    | 142.39              | 36737             | 0.007%      |
| 5S          | 1103   | 117.60              | 129717            | 0.024%      |
| snRNA       | 573    | 110.52              | 63328             | 0.012%      |
| CD-box      | 306    | 101.53              | 31067             | 0.006%      |
| HACA-box    | 85     | 124.48              | 10581             | 0.002%      |
| Splicing    | 182    | 119.12              | 21680             | 0.004%      |
| Pseudogenes | 3439   | 1155.04             | 3972170           | 0.748%      |

**Table S13.** Summary of structural variant analysis.

|               | Initial SV number | Number of SVs verified with Illumina reads | Number of SVs excluded from HH assembly | Number of SVs excluded from CC assembly and genotype difference | Number of final true SVs | Number of final true SVs in the Chc subgenome | Number of final true SVs in the Chh subgenome |
|---------------|-------------------|--------------------------------------------|-----------------------------------------|-----------------------------------------------------------------|--------------------------|-----------------------------------------------|-----------------------------------------------|
| Translocation | 9030              | 36                                         | 4                                       | 0                                                               | 32                       | 5                                             | 27                                            |
| Transposition | 14226             | 172                                        | 19                                      | 9                                                               | 144                      | 34                                            | 110                                           |
| Deletion      | 23926             | 5432                                       | 346                                     | 395                                                             | 4691                     | 709                                           | 3982                                          |
| Insertion     | 18001             | 2703                                       | 692                                     | 243                                                             | 1768                     | 447                                           | 1321                                          |
| Inversion     | 7113              | 64                                         | 18                                      | 0                                                               | 46                       | 1                                             | 45                                            |

**Table S14.** Statistics of gene retention cases of the quartet genes between *Cucumis sativus* (CC genome), *C. hystrix* (HH genome), and *C. ×hytivus* (Chc and Chh subgenomes).

| Cases           | Number of gene pairs |
|-----------------|----------------------|
| CC-subC-HH-subH | 15681                |
| CC-subC-HH      | 874                  |
| CC-HH-subH      | 0                    |
| CC-subC-subH    | 1729                 |
| subC-HH-subH    | 363                  |
| CC-HH           | 266                  |
| CC-subC         | 1581                 |
| HH-subH         | 498                  |
| subC-subH       | 585                  |
| Total           | 21577                |

**Table S15.** Protein quartet table listing the homologous gene sets among CC (*Cucumis sativus*), HH (*C. hystrix*), Chc and Chh subgenomes of *C. ×hytivus*. A dot (.) is placed where no homolog is identified in the respective genome due to several possible causes (different annotation methods, gene loss, truncation, pseudogenization, matching random scaffolds, transposed). These changes are tracked in the next few columns labeled CC-status, HH-status, Chc-status, and Chh-status. (Excel)

**Table S16.** Detailed statistics of syntenic orthologs loss in one of the compared genomes/subgenomes

| Loss type                                        |                                            | CC-subC | HH-subH |
|--------------------------------------------------|--------------------------------------------|---------|---------|
| Syntenic blocks                                  | Raw potential loss within syntenic blocks  | 266     | 1140    |
|                                                  | Gene is predictable                        | 115     | 206     |
|                                                  | Partial loss                               | 32      | 71      |
|                                                  | Pseudogene                                 | 4       | 8       |
|                                                  | Genes with depth >1 and coverage > 5%      | 115     | 853     |
|                                                  | Gene loss within syntenic blocks           | 0       | 2       |
| Synteny-excluded by blocks                       | Raw potential loss outside syntenic blocks | 4186    | 6181    |
|                                                  | Genes with depth >1 and coverage > 5%      | 4164    | 6037    |
|                                                  | Gene loss outside syntenic blocks          | 22      | 144     |
| Low depth and low coverage in actual male parent |                                            | 11      |         |
| Final gene loss                                  |                                            | 11      | 146     |

**Table S17.** Overall list of *Cucumis ×hytivus* deleted genes with their putative function. (excel)

**Table S18.** CC to HH conversion regions inferred by both syntenic analysis and read coverage. (excel)

**Table S19.** HH to CC conversion regions inferred by both syntenic analysis and read coverage. (excel)

**Table S20.** Homeologous gene expression profile. (excel)

**Table S21.** Illumina reads statistics.

| Sample ID      | Library | BaseSum        | GC(%) | Q20(%) | Q30(%) |
|----------------|---------|----------------|-------|--------|--------|
| F <sub>1</sub> | 270 bp  | 25,876,206,886 | 37.45 | 96.30  | 91.63  |
|                | 3K      | 25,622,693,518 | 38.38 | 96.26  | 92.25  |
|                | 4K      | 24,600,125,656 | 37.80 | 96.16  | 92.05  |
| S <sub>0</sub> | 270 bp  | 22,658,914,564 | 37.88 | 96.26  | 91.59  |
|                | 3K      | 30,862,422,132 | 37.90 | 95.85  | 91.53  |
|                | 4K      | 21,953,990,556 | 37.14 | 96.40  | 92.49  |
| S <sub>4</sub> | 270 bp  | 19,569,619,340 | 38.07 | 96.17  | 91.44  |
|                | 3K      | 23,619,021,688 | 38.36 | 96.48  | 92.82  |

|                 |        |                |       |       |       |
|-----------------|--------|----------------|-------|-------|-------|
|                 | 4K     | 26,707,581,632 | 37.65 | 96.67 | 93.14 |
| S <sub>5</sub>  | 270 bp | 21,159,909,070 | 37.44 | 96.10 | 91.45 |
|                 | 3K     | 26,160,424,250 | 39.05 | 94.75 | 89.99 |
|                 | 4K     | 24,304,640,652 | 37.76 | 94.75 | 89.94 |
| S <sub>6</sub>  | 270 bp | 25,705,297,170 | 37.21 | 96.20 | 91.62 |
|                 | 3K     | 27,386,077,256 | 36.91 | 95.07 | 90.16 |
|                 | 4K     | 24,505,234,404 | 36.52 | 94.75 | 89.62 |
| S <sub>7</sub>  | 270 bp | 24,394,700,068 | 37.23 | 95.97 | 91.26 |
|                 | 3K     | 20,011,708,104 | 38.20 | 95.33 | 90.63 |
|                 | 4K     | 19,670,409,682 | 37.82 | 95.02 | 90.01 |
| S <sub>8</sub>  | 270 bp | 28,523,009,084 | 37.27 | 96.09 | 91.43 |
|                 | 3K     | 23,805,228,268 | 38.83 | 95.32 | 90.97 |
|                 | 4K     | 23,626,693,594 | 37.96 | 95.41 | 91.13 |
| S <sub>9</sub>  | 270 bp | 24,694,180,048 | 37.41 | 96.10 | 91.47 |
|                 | 3K     | 24,091,959,996 | 38.70 | 95.17 | 90.74 |
|                 | 4K     | 20,263,719,894 | 38.22 | 95.06 | 90.38 |
| S <sub>10</sub> | 270 bp | 24,572,250,602 | 37.40 | 96.64 | 92.56 |
|                 | 3K     | 20,087,173,984 | 38.28 | 95.07 | 90.09 |
|                 | 4K     | 20,262,030,596 | 37.87 | 95.25 | 90.41 |
| S <sub>11</sub> | 270 bp | 24,581,743,442 | 37.17 | 96.69 | 92.68 |
|                 | 3K     | 23,820,475,538 | 38.29 | 96.52 | 92.87 |
|                 | 4K     | 23,495,452,914 | 37.66 | 96.61 | 93.01 |
| S <sub>12</sub> | 270 bp | 24,853,336,104 | 37.20 | 96.72 | 92.74 |
|                 | 3K     | 21,618,242,582 | 38.76 | 94.76 | 89.56 |
|                 | 4K     | 24,326,558,914 | 38.06 | 95.18 | 90.29 |
| S <sub>13</sub> | 270 bp | 27,868,124,042 | 37.10 | 96.74 | 92.78 |
|                 | 3K     | 24,757,592,582 | 38.06 | 95.15 | 90.25 |
|                 | 4K     | 21,583,616,480 | 37.76 | 95.06 | 90.08 |

**Table S22.** Genes confirmed deleted in *Cucumis ×hytivus* Chc subgenome and survey of their status in a diversity set of F<sub>1</sub>, S<sub>0</sub>, and subsequent generations (S<sub>4</sub>-S<sub>13</sub>). (excel)

**Table S23.** Genes confirmed deleted in *Cucumis ×hytivus* Chh subgenome and survey of their status in a diversity set of F<sub>1</sub>, S<sub>0</sub>, and subsequent generations (S<sub>4</sub>-S<sub>13</sub>). (excel)

**Table S24.** SNP detected in chloroplast genomes of F<sub>1</sub>, S<sub>0</sub>, and subsequent generations (S<sub>4</sub>-S<sub>13</sub>) of *Cucumis ×hytivus* in comparison to *C. hystrix*. (excel)

**Table S25.** Indels detected in chloroplast genomes of F<sub>1</sub>, S<sub>0</sub>, and subsequent generations (S<sub>4</sub>-S<sub>13</sub>) of *Cucumis ×hytivus* in comparison to *C. hystrix*. (excel)

**Table S26.** The structure and locus of R gene in *Cucumis ×hytivus*.

**Table S27.** Syntenic comparison of R gene in *Cucumis ×hytivus* and parents.

**Table S28.** KEGG enrichment list of genes having structural variant in the coding sequence or upstream region in *Cucumis ×hytivus*. (excel)

**Table S29.** Statistic of PacBio sub-reads length distribution.

| Length (bp) | Num       | Total length (bp) | Average length (bp) |
|-------------|-----------|-------------------|---------------------|
| 0~2000      | 887,886   | 1,066,234,367     | 1,201               |
| 2000~4000   | 876,714   | 2,592,240,211     | 2,957               |
| 4000~6000   | 715,426   | 3,556,339,552     | 4,971               |
| 6000~8000   | 610,546   | 4,257,704,336     | 6,974               |
| 8000~10000  | 523,316   | 4,695,937,226     | 8,973               |
| 10000~12000 | 462,945   | 5,086,705,151     | 10,988              |
| 12000~14000 | 459,148   | 5,966,459,634     | 12,995              |
| 14000~16000 | 389,910   | 5,830,336,133     | 14,953              |
| 16000~18000 | 287,456   | 4,871,187,860     | 16,946              |
| 18000~      | 690,833   | 16,000,482,143    | 23,161              |
| Total       | 5,904,180 | 53,923,626,613    | 9,133               |

**Table S30.** Genome assembly statistics of F<sub>1</sub>, S<sub>0</sub>, and subsequent generations (S<sub>4</sub>-S<sub>13</sub>) of *Cucumis ×hytivus*. (excel)
